# Supplementary material for: Emerging investigators series: building a theory for smart stormwater systems
Source: Royal Society of Chemistry journal article supplement (doi:10.1039/c6ew00211k), 2016-10-13
Supplement: c6ew00211k1.pdf [file c6ew00211k1.pdf]

Electronic Supplementary Information (ESI):

Models and data are available at <https://github.com/kLabUM/control-sim-es-wrt>
